# Supplementary material
Source: PubMed Central journal article supplement (PMC3783178)

## Supplemental Materials

Supplemental Table 1..... pages 2/3

Supplemental Figure 1.....page 4/5

Supplemental Figure 2.....pages 6/7

Supplemental Figure 3.....page 8

**Table S1. Primers.**

**Primers used for cDNA quantitation**

|                 |                                                        |
|-----------------|--------------------------------------------------------|
| <i>Nctc1:</i>   | 5'- AGATGAGCATGAAAGCCAAG<br>5'- TCCATCTCCCTTGCTGTATC   |
| <i>Nctc1b:</i>  | 5'- CTGAAGGGAAGGATCCTCTAC<br>5'- CAGCTTCACTCTCAGCTCAAG |
| <i>asNctc1:</i> | 5'- GTGATCTGGTGAACAAGGTCA<br>5'- CCAAGTCGCTCTCTTGTAGAC |
| <i>lacZ:</i>    | 5'- CATCGAGCTGGGTAATAAGC<br>5'- GCCATTTGACCACTACCATC   |
| <i>H19:</i>     | 5'- TGAGTTTCTAGGGAGGGAG<br>5'- ATTCCTGAGGCAGGTAGTG     |
| <i>Igf2:</i>    | 5'- GAGCTTGTTGACACGCTTC<br>5' ACGTTTGGCCTCTCTGAAC      |
| <i>Gapdh:</i>   | 5'- CCTTCATTGACCTCAACTACAT<br>5'- CAAAGTTGTCATGGATGACC |
| <i>hnNctc1:</i> | 5'-CCCTATCTGCAATGTTTTCT<br>5'-GATGGTGCGTATTGTTGCTA     |

**Primers used in strand-specific RT-PCR**

|     |                            |
|-----|----------------------------|
| 1A: | 5'-CAGAGTGGATGCAGAGGTG     |
| 2A: | 5'-GTCTGTCATCTCACCTCTTAG   |
| 3A: | 5'-GCAGCTAATGACAACCAGAG    |
| 4A: | 5'-GAGCCTCGATCCTTGCTG      |
| 1B: | 5'-GTTCCCTCCACATCAGGAG     |
| 2B: | 5'-CTTGCCAGGAGATATGGAAC    |
| 3B: | 5'-TCTGGACTAATTATTTGCTTAGG |
| 4B: | 5'-ATCAGATTCCTGACTTCGATC   |
| 1D: | 5'-TTGCCCTTCTCTCTATCTAGG   |
| 2D: | 5'-GGTCATGAGTGAGACACCAGTC  |
| 3D: | 5'-CTATTTCTTGGGTCCCCCATGC  |
| 4D: | 5'-GAATGGTGCGTATTGTTGCTA   |
| 1E: | 5'-TTCCAAGCCCTTTGATCTGG    |
| 2E: | 5'-GAGCCTCGCATCCTGCCTG     |
| 3E: | 5'-GCTTCACAGACCTCAGGACC    |
| 4E: | 5'-GATGCCAGGTGACTCTG       |

**Primers used in 5'-RACE**

|                               |                            |
|-------------------------------|----------------------------|
| Primer for antisense priming: | 5'-ATAGAGCCCAGAGAGTGCTAA   |
| Nested primer:                | 5'-GTAGATGGTGAAGCAGAGTCCTT |

### **Primers used in ChIP analysis**

*H19* exon1:           5'- CAAAAGTAACCGGGATGAA  
                          5'- CTGGAGTCTGGCAGGAATGT

*Nctc1* exon1:        5'- ACATTCAGGCAGTGACCAAT  
                          5'- GCTCCGACCTGAATATCTTG

Core muscle  
enhancer:            5'- AGGAGCAGCTGTTCTCCTCATCTT  
                          5'- ACAAGTGGCCATGTCCTCCTCAAA

### **siRNAs**

I:                    GGAUGGAGAUGAGCAUGAAAGCCAA  
II:                   CAUCAUAGCUUGGCUGACCAGCUCA  
III:                  CCAGGACUAUCAAGGUCUUACUUGA

### **Primers used to analyze the terminator insertion**

1:                    5'- AGATGAGCATGAAAGCCAAG  
2:                    5'- GCTCCGACCTGAATATCTTG  
3:                    5'- ACATGAGCAGTTGAAGAAGGA  
4:                    5'- AGAAGGGCTCCCTAGACATGG  
T1:                  5'- GATCCTGAGACTTCCACACTG  
T2:                  5'- ATTGATGAACCTGGAGGATGT

**Figure S1. Structure and transcription of the *Nctc1* locus.** (A) The *Nctc1* gene structure and conserved sequences (<http://genome.ucsc.edu>). The conserved promoter (blue circle) and core muscle enhancer (red circle) regions are indicated. (B) RT-PCR demonstrates the presence of *Nctc1a* and *Nctc1b* isoforms. Quantitative analyses indicate that the 1a isoform represents about 97% of total *Nctc1* sense transcripts (n=3). (C) Relative abundance of *asNctc1* transcript in stably transfected  $\Delta$ ME/ $\Delta$ ME myocytes with (construct II) and without (construct IV) the CME. N=3; mean  $\pm$  standard deviation. (D) Relative amounts of sense and antisense transcripts were estimated by comparing crossing threshold (Ct) values in qRT-PCR analyses of 5 cDNAs prepared from RNAs purified from p4 muscle.

**A**

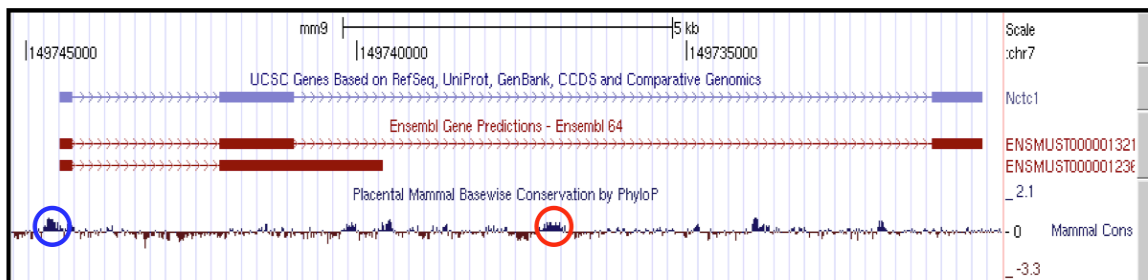

**B**

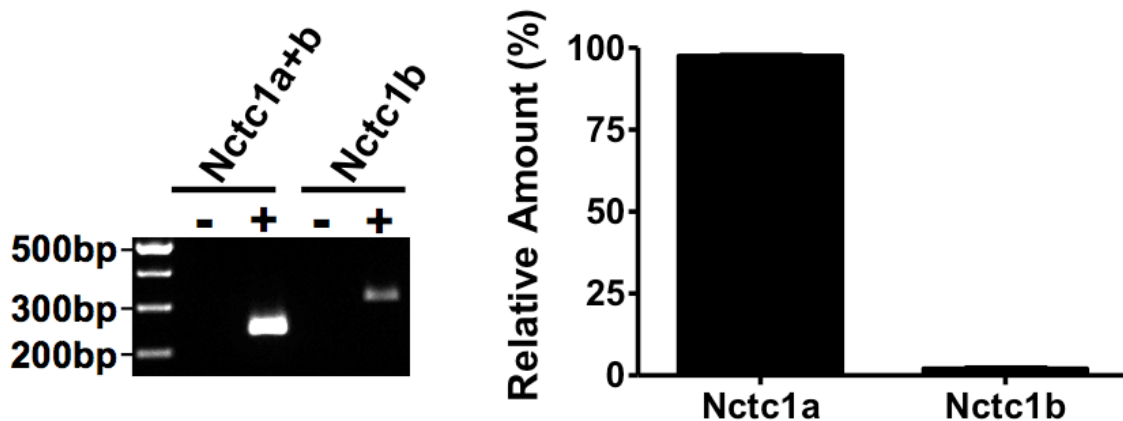

C

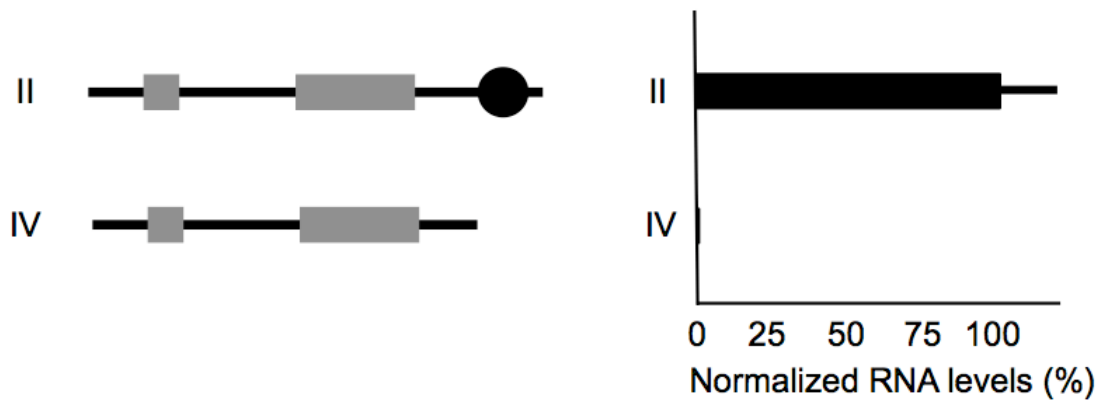

D  $\Delta Ct = Ct(\text{sense transcript}) - Ct(\text{antisense transcript}) = -1.1 \pm 0.6$  (n = 5).

**Figure S2. A transcriptional terminator insertion stops *Nctc1* transcription through the core muscle enhancer.** (A) Plasmid constructs (described in Figure 3C) with PCR primers used in transcriptional analysis. Primers 1-4 recognize *Nctc1* sequences common to both plasmids. Primers T1 and T2 recognize ends of the 2.2 kb transcriptional terminator inserted into the *NsiI* restriction site in intron 1. (B) To determine whether the termination signal effectively blocks transcription of *Nctc1*, Construct II (left panel) and Construct II-Stop (right panel) were separately transfected in  $\Delta$ ME/ $\Delta$ ME primary myoblasts. Since, the *Nctc1* locus is deleted from  $\Delta$ ME chromosomes, there is no endogenous *Nctc1* RNA to confound the PCR analysis. cDNAs were prepared without (-) or with (+) reverse transcriptase and analyzed using the primer pairs indicated. As expected, Construct II generates cDNAs recognized by primer pairs 1+2 (*Nctc1* hnRNA) and 1+4 (*Nctc1* mRNA). In contrast, Construct II-Stop generates cDNAs recognized by 1+2 primer pair but not by the 1+4 primer set. In addition, analysis with primers specific to the Termination insertion (T1 +3 and T2 + 4) indicates that transcription stops at the insertion. (C) To determine whether the termination signal effectively blocks transcription of *Nctc1* in a wild type context, construct II, construct II-Stop, or a control plasmid with no *Nctc1* insert (Ctrl) were stably transfected into primary myoblasts derived from C/C mice (Gould and Pfeifer 1998). C/C is an FVB congenic strain where the distal 7 chromosomal region is wild type but *Mus castaneus* (Cast) in origin. Plasmid constructs carry *Nctc1* sequences that are of *Mus domesticus* (Dom) in origin. Restriction length polymorphisms (RFLPs) (\*) allow us to distinguish Cast and Dom *Nctc1* cDNAs. In each panel, Lane 1 (C/D) is a control that represents cDNA obtained from an untransfected wild type C/D cell line and thus demonstrates the expected band sizes for C

(Cast) and for D (Dom) cDNAs. Lanes 2-4 (II, II-Stop, Ctrl) represent cDNAs generated from C/C cells transfected with construct II, II-Stop, and control plasmids, respectively. Looking at the Dom specific PCR products, we see that Construct II transfectants generate *Nctc1* cDNAs that can be amplified by primer pairs 1+2 (left panel) and 1+4 (right panel). In contrast, Construct II-Stop generates *Nctc1* cDNAs that can be amplified by primer pairs 1+2 but not by primers 1+4. In each panel, M = DNA size ladder.

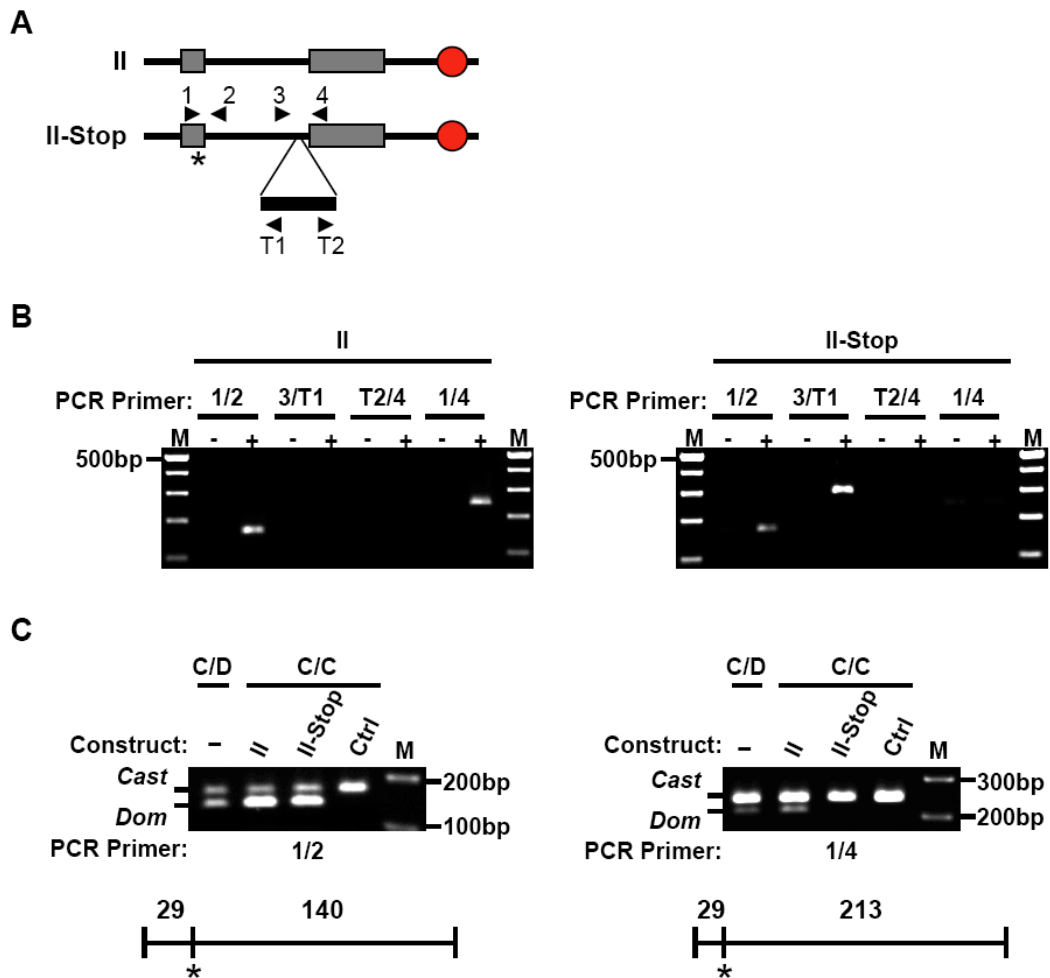

**Figure S3. Enhancer marks at the CME are not dependent on *Nctc1* transcription.**

Primary myoblasts were isolated from  $\Delta ME/\Delta ME$  pups and stably transfected with Construct II or with Construct IV (see Figure 3 for construct maps). Pooled transfectants were differentiated in vitro for 24 hours and analyzed by chromatin immunoprecipitation for Histone H3K4me1 and for Serine-5-RNA Polymerase II accumulation at the core muscle enhancer. Construct II expresses high levels of *Nctc1* RNA but Construct IV carries a mutation at the *Nctc1* promoter and so expresses no antisense *Nctc1* and only minimal levels of sense *Nctc1*. (See Figure 3 for expression data). ChIP signals are normalized to input DNA and therefore account for the variable copy numbers associated with the transfections. N = 3, mean  $\pm$  standard deviation.

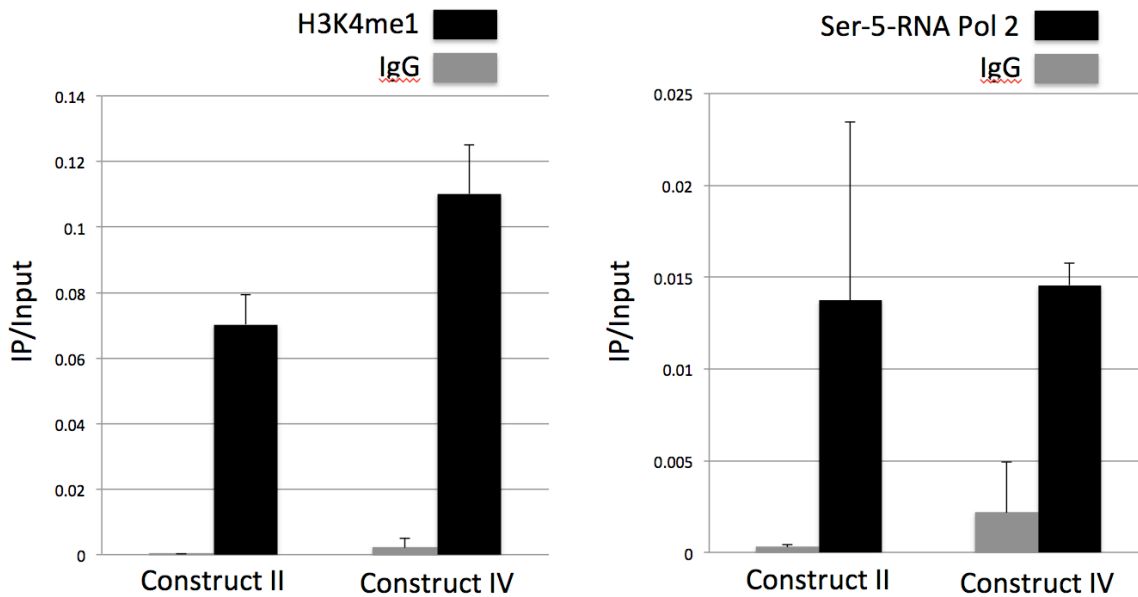

Supplement: supp_gkt597_nar-00466-x-2013-File008.pdf [file supp_gkt597_nar-00466-x-2013-File008.pdf]
